# Supplementary material for: Evaluation of the potential anti-soybean allergic activity of different forms of Lactobacillus delbrueckii subsp. bulgaricus based on cell model in vitro
Source: Royal Society of Chemistry journal article supplement (doi:10.1039/d2fo02189g), 2022-12-06
Supplement: d2fo02189g1.xlsx [file d2fo02189g1.xlsx]

## Sheet: Sheet1
Fig.1A
β-HEX	0	10	50	100	200
	38.574	38.7199	40.4121	42.7624	45.2018
	36.6088	35.6786	37.3937	39.3836	42.9463
	35.6597	37.0152	37.6187	40.9901	43.2879
	35.5242	37.2121	42.1726	40.8014	47.6629
	33.7065	34.7743	41.0908	39.3799	45.216
	35.1413	35.1772	40.9171	39.4316	43.9045
Fig.1B
Histamine	0	10	50	100	200
	16.2667	15.9623	16.4607	16.7077	17.1292
	16.2797	16.167	16.5189	16.8543	17.0818
Fig.1C
β-HEX	N	SP	MRS	SB	LB	IB
	46.7598	57.0152	49.4188	49.9907	51.4279	54.6198
	44.7067	55.7744	49.0907	49.3799	51.4121	54.5786
	46.3414	56.1773	49.3172	49.4313	51.7786	54.5152
Fig.1D
Histamine	N	SP	MRS	SB	LB	IB
	16.3735	18.3152	16.0174	16.6901	15.9877	16.1198
	16.3041	18.6744	16.1171	16.6799	15.9771	16.4789
	16.3087	18.1772	15.9092	16.7916	15.9847	17.7157
Fig.1E
IL-6	N	SP	MRS	SB	LB	IB
	85.5737	120.317	102.018	101.69	91.9885	89.1195
	86.3073	121.675	100.718	92.6788	93.6776	94.4787
	89.9092	122.078	104.908	94.7976	98.1844	96.7175
Fig.1F
TNF-α	N	SP	MRS	SB	LB	IB
	26.8743	39.3142	37.1143	36.9916	36.0885	36.1196
	27.9421	41.9027	35.9175	37.2787	36.0792	36.4787
	26.4075	38.7762	36.6077	36.7923	36.0852	36.5175
Fig.2A
IL-6	N	LPS	M1	S1	L1	I1	M50	S50	L50	I50	M100	S100	L100	I100	M200	S200	L200	I200
	4.62124	8.81571	6.39696	6.56522	7.95234	6.02275	5.50271	6.51457	5.77521	6.51917	6.78213	6.80587	6.94457	5.57238	6.33575	6.29233	7.12438	5.50271
	5.12475	7.78427	6.05087	7.42826	7.23124	7.11389	7.13024	6.07247	4.27975	5.89747	6.19277	6.23811	6.52575	6.24387	6.72744	5.98561	7.70277	5.68174
	5.54142	8.08507	7.23754	6.60543	6.46752	6.2242	6.64724	7.03424	5.46173	6.45727	5.92237	7.31191	6.72387	5.73467	6.16675	6.06087	7.54571	5.68354
Fig.2B
IL-8	N	LPS	M1	S1	L1	I1	M50	S50	L50	I50	M100	S100	L100	I100	M200	S200	L200	I200
	16.6238	22.4573	19.1274	16.7294	12.7316	12.0642	16.8915	17.0846	12.9316	12.3867	17.9761	12.9774	13.0245	12.4344	20.0634	14.5161	17.1206	13.9316
	17.4247	23.7427	19.3218	17.1936	12.5327	15.3345	16.3211	17.1325	14.0149	16.6324	19.9491	12.9613	13.4375	12.7611	15.4314	15.1649	17.0056	16.1165
	16.4561	19.6197	18.9762	16.203	12.2619	11.462	14.9371	18.4342	11.1373	15.2377	15.8372	13.0735	13.9521	13.8345	20.9646	16.3112	17.0601	14.1526
Fig.3A
TEER	10	12	14	16	18	20	21
	528.64	414.4	498.4	470.4	470.4	478.24	461.44
	450.24	432.32	515.2	477.12	408.8	472.64	543.2
	444.64	428.96	504	471.52	430.08	496.16	473.76
	421.12	430.08	476	490.56	428.96	481.6	464.8
	380.8	435.68	489.44	465.92	455.84	482.72	496.16
	453.6	448	495.04	479.36	454.72	483.84	478.24
	374.08	448	499.52	476	463.68	465.92	491.68
	464.8	465.92	483.84	507.36	488.32	452.48	515.2
	368.48	456.96	482.72	472.64	479.36	509.6	456.96
	388.64	452.48	509.6	490.56	495.04	505.12	476
	413.28	444.64	509.6	497.28	537.6	491.68	468.16
Fig.3B
TEER	10	12	14	16	18	20	21
	431.2	606.48	604.8	697.2	481.04	498.4	522.48
	437.92	574.56	594.72	682.08	472.64	493.36	450.24
	449.12	548.24	607.04	659.12	447.44	477.68	439.04
	471.52	574	645.12	673.68	484.96	491.68	470.4
	451.36	544.32	576.24	661.36	502.88	493.36	448
	468.16	561.68	582.4	645.68	493.36	493.92	449.12
	512.96	557.2	570.08	636.72	488.88	493.92	460.32
	519.68	603.68	636.16	639.52	482.16	492.8	485.52
	500.64	600.32	594.72	612.64	499.52	508.48	480.48
	507.36	585.2	606.48	618.24	500.08	519.68	486.08
	572.32	568.4	594.16	628.32	472.64	497.28	465.36
Fig.3C
OD490 nm	0	0	0	0
	1.25	0.043971	0.043708	0.042726
	2.5	0.087985	0.087558	0.087051
	5	0.175396	0.17613	0.175341
	10	0.347333	0.348605	0.34875
	20	0.692847	0.689128	0.68487
Fig.4A
TEER	N	1:1	1:50	1:100	1:200	1:1	1:50	1:100	1:200
	112.778	125.312	113.452	118.519	116.216	111.705	117.325	114.045	115.23
	107.278	106.7	97.8824	106.01	103.902	97.8824	110.452	105.722	121.614
	95.1691								106.718
Fig.4B	N	1:1	1:50	1:100	1:200	1:1	1:50	1:100	1:200
TEER	78.3843	88.3008	96.2751	88.0102	90.4	81.3268	89.8734	91.6667	86.2651
	84.9287	88.8372	103.023	93.8356	94.0476	88.2883	94.4828	95.4545	92.5439
	84.0237	87.7155	98.3721	88.6076	88.8889	87.5803	89.8488	92.9936	91.1828
Fig.4C
TEER	N	LPS	1:1	1:50	1:100	1:200	1:1	1:50	1:100	1:200
	100	76.9424	78.0549	71.5556	70.7692	78.9855	99.9578	91.1917	90.3941	100
	102.764	84.738	93.7209	88.1432	86.3839	89.0698	105.962	101.023	104.639	101.728
	104.569	75.1231					106.922	109.091	108.549	99.7579
Fig.4D
TEER	N	LPS	1:1	1:50	1:100	1:200	1:1	1:50	1:100	1:200
	89.415	69.6514	94.3218				82.4773	79.1549		101.676
	89.4484	60.9694	85.3403	89.9755	87.5912	91.6456	60.9694	79.562	78.3333	90.5213
	100.704	78.3333	85.5037	87.234	93.0952	97.0588	79.9511	86.2981	84.7032	91.2736
Fig.4E
TEER	N	LPS	1:1	1:50	1:100	1:200	1:1	1:50	1:100	1:200
	97.709	114.374	106.852	106.47	103.494	109.448	97.709	102.152	98.4627	98.8244
	99.664	113.783	111.127	113.553	106.723	112.559	99.664	102.003	99.8368	98.3707
	102.627	116.861	111.38	109.318	108.125	108.64	102.627	98.7227	102.872	99.2945
Fig.4F
TEER	N	LPS	1:1	1:50	1:100	1:200	1:1	1:50	1:100	1:200
	101.181	131.001	108.408	104.752	109.646	126.049	124.226	118.846	118.6	122.151
	101.034	132.18	111.49	105.994	109.129	130.067	126.727	119.36	115.728	119.557
	97.7847	130.913	107.608	106.896	111.288	128.57	125.162	120.886	120.816	126.683
		123.549
		124.175
Fig.5A
IFN-γ/IL-4	0	10	20	40	80	100
	0.356566	0.284396	0.069293	0.112857	0.106084	0.066023
	0.31781	0.155597	0.051094	0.114428	0.124574	0.092972
	0.320562	0.219953	0.043286	0.217082	0.103224	0.073719
Fig.5B
IL-10	0	10	20	40	80	100
	29.8336	26.9714	11.9425	14.4214	27.2292	52.9359
	30.0247	18.0847	14.2392	19.4347	14.4658	52.1314
		11.8847		18.7547	23.3559
Fig.5C
Cell viability	N	M1	S1	L1	I1	M50	S50	L50	I50	M100	S100	L100	I100	M200	S200	L200	I200
	100.124	83.439	87.2638	116	91.657	87.8638	92.2478	114.196	96.3794	112.443	131.903	144.106	156.667	124.818	137.477	174.186	165.915
	99.3427	96.7472	99.1486	113.896	93.1127	91.671	99.2655	120.644	112.789	118.253	119.544	164.639	167.048	122.417	138.135	167.382	160.896
	100.533	89.2438	82.7779	116.224	96.8812	97.5948	73.5208	115.867	107.893	120.352	123.987		158.594	128.267	141.001		166.482
Fig.5D
IFN-γ	N	SP	M1	S1	L1	I1	M50	S50	L50	I50	M100	S100	L100	I100	M200	S200	L200	I200
	5.85637	3.62746	4.23475	3.25954	11.4802	7.20202	3.04682	2.77257	5.16448	8.15714	2.38908	3.48098	4.19118	6.31063	2.72417	2.8087	3.97433	5.07252
	5.12379	3.43771	3.20055	3.29375	11.8396	8.64071	2.74955	3.54141	4.3784	8.62286	3.23289	3.5572	3.74324	7.17536	3.27233	2.88377	2.86876	7.23107
	5.14693	3.40921	3.32285	4.79505	11.8333	6.86008	2.5623	2.91886	3.03124		3.39784	3.46244	3.91711	6.31512	3.69663	2.79388	3.00292	5.58808
Fig.5E	N	SP	M1	S1	L1	I1	M50	S50	L50	I50	M100	S100	L100	I100	M200	S200	L200	I200
IL-4	19.0309	18.4946	18.397	17.5652	15.952	14.6221	18.0176	15.5111	15.7463	13.8897	17.8213	18.1059	15.6441	12.6214	16.3378	15.2923	15.1448	16.1867
	16.7302	17.9359	19.0509	16.5283	16.2302	14.7139	18.5302	15.4226	16.3796	14.4588	19.9998	15.9381	16.38	15.7398	19.8213	14.9856	15.9609	13.7729
		17.6061	18.9617	17.6054	17.8656	14.0197	18.6465	17.0339	15.9639		20.8215	15.0119	13.2239		19.6665	16.0609	13.0622
Fig.5F
IFN-γ/IL-4	N	SP	M1	S1	L1	I1	M50	S50	L50	I50	M100	S100	L100	I100	M200	S200	L200	I200
	0.327527	0.20139	0.225214	0.189145	0.688156	0.498344	0.165605	0.173403	0.322177	0.57549	0.122219	0.212878	0.27788	0.445019	0.146393	0.181837	0.269947	0.338624
	0.286556	0.190855	0.170213	0.191131	0.7097	0.597895	0.149447	0.221487	0.273139		0.165386	0.21754	0.248181	0.505998	0.175851	0.186697	0.194854	0.482722
	0.287851	0.189273	0.176717	0.278248	0.709321	0.474684	0.13927	0.182552	0.189099	0.608347	0.173825	0.211745	0.259709	0.445335	0.198652	0.180877	0.203966	0.373041
Fig.5G
IL-10	N	SP	M1	S1	L1	I1	M50	S50	L50	I50	M100	S100	L100	I100	M200	S200	L200	I200
	49.67	32.9944	33.9367	30.4456	43.4189	29.07	26.2411	33.46	41.6667	39.6644	25.1389	29.4744	30.1222	31.6911	34.2189	37.2333	33.9167	54.3011
	45.0589	33.9478	39.2233	30.7656	39.8967	29.1533	28.1	32.2422	37.3378	30.6078	27.0133	28.4244	31.6478	26.1911	31.6311	32.8967	29.0456	46.2422
			25.54	34.3389	39.6244	31.2122	23.9067	32.3922		28.1633	24.31	25.8633		27.1767	36.9133	28.9389	29.5511	43.9733
Fig.6
IFN-γ	N	SP	M1	S1	L1	I1	M50	S50	L50	I50	M100	S100	L100	I100	M200	S200	L200	I200
	5.85637	3.62746	4.23475	3.25954	11.4802	7.20202	3.04682	2.77257	5.16448	8.15714	2.38908	3.48098	4.19118	6.31063	2.72417	2.8087	3.97433	5.07252
	5.12379	3.43771	3.20055	3.29375	11.8396	8.64071	2.74955	3.54141	4.3784	8.62286	3.23289	3.5572	3.74324	7.17536	3.27233	2.88377	2.86876	7.23107
	5.14693	3.40921	3.32285	4.79505	11.8333	6.86008	2.5623	2.91886	3.03124		3.39784	3.46244	3.91711	6.31512	3.69663	2.79388	3.00292	5.58808
	N	SP	M1	S1	L1	I1	M50	S50	L50	I50	M100	S100	L100	I100	M200	S200	L200	I200
IL-4	19.0309	18.4946	18.397	17.5652	15.952	14.6221	18.0176	15.5111	15.7463	13.8897	17.8213	18.1059	15.6441	12.6214	16.3378	15.2923	15.1448	16.1867
	16.7302	17.9359	19.0509	16.5283	16.2302	14.7139	18.5302	15.4226	16.3796	14.4588	19.9998	15.9381	16.38	15.7398	19.8213	14.9856	15.9609	13.7729
		17.6061	18.9617	17.6054	17.8656	14.0197	18.6465	17.0339	15.9639		20.8215	15.0119	13.2239		19.6665	16.0609	13.0622
IFN-γ/IL-4	N	SP	M1	S1	L1	I1	M50	S50	L50	I50	M100	S100	L100	I100	M200	S200	L200	I200
	0.327527	0.20139	0.225214	0.189145	0.688156	0.498344	0.165605	0.173403	0.322177	0.57549	0.122219	0.212878	0.27788	0.445019	0.146393	0.181837	0.269947	0.338624
	0.286556	0.190855	0.170213	0.191131	0.7097	0.597895	0.149447	0.221487	0.273139		0.165386	0.21754	0.248181	0.505998	0.175851	0.186697	0.194854	0.482722
	0.287851	0.189273	0.176717	0.278248	0.709321	0.474684	0.13927	0.182552	0.189099	0.608347	0.173825	0.211745	0.259709	0.445335	0.198652	0.180877	0.203966	0.373041
IL-10	N	SP	M1	S1	L1	I1	M50	S50	L50	I50	M100	S100	L100	I100	M200	S200	L200	I200
	49.67	32.9944	33.9367	30.4456	43.4189	29.07	26.2411	33.46	41.6667	39.6644	25.1389	29.4744	30.1222	31.6911	34.2189	37.2333	33.9167	54.3011
	45.0589	33.9478	39.2233	30.7656	39.8967	29.1533	28.1	32.2422	37.3378	30.6078	27.0133	28.4244	31.6478	26.1911	31.6311	32.8967	29.0456	46.2422
			25.54	34.3389	39.6244	31.2122	23.9067	32.3922		28.1633	24.31	25.8633		27.1767	36.9133	28.9389	29.5511	43.9733
